# Supplementary material
Source: PubMed Central journal article supplement (PMC4940135)
Supplement: NIHMS787262-supplement-supplement_1.pdf [file NIHMS787262-supplement-supplement_1.pdf]

**Online Table 1: Biopsy Site and Organ Transplantation in symptomatic subjects**

|                                  | USA                |                             |                                   | Rest of World       |                             |                                     |
|----------------------------------|--------------------|-----------------------------|-----------------------------------|---------------------|-----------------------------|-------------------------------------|
|                                  | Overall<br>(n=330) | Cardiology Sites<br>(n=309) | Non-Cardiology<br>Sites<br>(n=21) | Overall<br>(n=1541) | Cardiology Sites<br>(n=290) | Non-Cardiology<br>Sites<br>(n=1251) |
| Tissue type (number of biopsies) | 353                | 338                         | 15                                | 1356                | 251                         | 1105                                |
| Abdominal fat pad/fat pad        | 55 (15.6%)         | 54 (16.0%)                  | 1 (6.7%)                          | 228 (16.8%)         | 31 (12.4%)                  | 197 (17.8%)                         |
| Cardiac                          | 226 (64.0%)        | 220 (65.1%)                 | 6 (40.0%)                         | 174 (12.8%)         | 151 (60.2%)                 | 23 (2.1%)                           |
| GI (except rectum)               | 16 (4.5%)          | 14 (4.1%)                   | 2 (13.3%)                         | 96 (7.1%)           | 21 (8.4%)                   | 75 (6.8%)                           |
| Nerve                            | 12 (3.4%)          | 10 (3.0%)                   | 2 (13.3%)                         | 108 (8.0%)          | 13 (5.2%)                   | 95 (8.6%)                           |
| Skin                             | 2 (0.6%)           | 1 (0.3%)                    | 1 (6.7%)                          | 55 (4.1%)           | 2 (0.8%)                    | 53 (4.8%)                           |
| Rectal                           | 4 (1.1%)           | 4 (1.2%)                    | 0                                 | 48 (3.5%)           | 23 (9.2%)                   | 25 (2.3%)                           |
| Salivary gland                   | 0                  | 0                           | 0                                 | 579 (42.7%)         | 1 (0.4%)                    | 578 (52.3%)                         |
| Other*                           | 39 (10.8%)         | 35 (10.4%)                  | 3 (20.0%)                         | 68 (4.85.0%)        | 9 (3.6%)                    | 59 (5.3%)                           |
| Transplants                      |                    |                             |                                   |                     |                             |                                     |

|                                                                                                                                                                                                                                             |           |          |           |             |            |                 |
|---------------------------------------------------------------------------------------------------------------------------------------------------------------------------------------------------------------------------------------------|-----------|----------|-----------|-------------|------------|-----------------|
| Liver Transplant                                                                                                                                                                                                                            | 11 (3.3%) | 9 (2.9%) | 2 (9.5%)  | 286 (18.6%) | 51 (17.6%) | 235 (17.918.8%) |
| Heart Transplant                                                                                                                                                                                                                            | 11 (3.3%) | 8 (2.6%) | 3 (14.3%) | 16 (1.0%)   | 13 (4.5%)  | 3 (0.2%)        |
| *Other locations for biopsy include stomach, small bowel, bone marrow, eye, eye vitrectomy, liver, lung, lymph node, median nerve/carpal tunnel tissue, sigmoid, synovial and transynovial tissue, thyroid, and transverse carpal ligament. |           |          |           |             |            |                 |
